# Supplementary material for: Use of Telemedicine and Quality of Care Among Medicare Enrollees With Serious Mental Illness
Source: PubMed Central journal article supplement (PMC10611994; doi:10.1001/jamahealthforum.2023.3648), 2023-10-27
Supplement: jamahealthforum-e233648-s002.pdf [file jamahealthforum-e233648-s002.pdf]

## Data Sharing Statement

Wilcock. Use of Telemedicine and Quality of Care Among Medicare Enrollees with Serious Mental Illness. *JAMA Health Forum*. Published October 27, 2023.

doi:10.1001/jamahealthforum.2023.3648

### Data

**Data available:** No

### Additional Information

**Explanation for why data not available:** These data are accessible with a Data Use Agreement with CMS only. Interested readers should contact RESDAC for more information on access.
